# Supplementary material for: The complete mitochondrial genome of Indian gaur, Bos gaurus and its phylogenetic implications
Source: PubMed Central journal article supplement (PMC7371690; doi:10.1038/s41598-020-68724-6), 2020-07-20
Supplement: 41598_2020_68724_MOESM1_ESM.pdf [file 41598_2020_68724_MOESM1_ESM.pdf]

**The complete mitochondrial genome of Indian gaur, *Bos gaurus* and  
its phylogenetic implications**

Ranganathan Kamalakkannan<sup>#</sup>(<https://orcid.org/0000-0001-8378-4629>), Karippadakam  
Bhavana<sup>#</sup>(<https://orcid.org/0000-0002-8287-9957>), Vandana R Prabhu<sup>#</sup>  
(<https://orcid.org/0000-0002-6302-8022>), Dhandapani Sureshgopi, Hijam Surachandra  
Singha (<https://orcid.org/0000-0002-3108-0846>) and Muniyandi Nagarajan\*  
(<https://orcid.org/0000-0001-8328-9767>)

Department of Genomic Science  
School of Biological Sciences  
Central University of Kerala  
Kasaragod-671316, Kerala, India

<sup>#</sup>These authors contributed equally to this work

\*Corresponding author email: [nagarajan@cukerala.ac.in](mailto:nagarajan@cukerala.ac.in)

**Table S1.** The primers used to amplify the mitogenome for the DNA isolated from the dung samples (Hassanin et al. 2009)<sup>20</sup>

| S. No | Primer Sequence                                     | Annealing temperature(°C) |
|-------|-----------------------------------------------------|---------------------------|
| 1     | 1F-ACCATGCCCGTGAACCAGCA<br>1R-GYGYGGATRCTTGCATGTGTA | 54                        |
| 2     | 2F-CACTGAAAATGCCTAGATGAG<br>2R-CTAGGTGTAACTAGRTGCTT | 55                        |
| 3     | 3F-GCACGCACACCCGCCGTCAC<br>3R-CGCTTCTTAATTGRTGGCTGC | 57                        |

|    |                              |      |
|----|------------------------------|------|
| 4  | 4F-AGCCTGGTGATAGCTGGTTGTCC   | 51   |
|    | 4R-AAGCTCCATAGGGTCTTCTCGTC   |      |
| 5  | 5F-CCGTGCAAAGGTAGCATAATCA    | 55   |
|    | 5R-CCTAGNACTTTTCGTTCTNACTA   |      |
| 6  | 6F-GTGGCAGAGCCCGGTAATTG      | 51   |
|    | 6R-TTACTCTATCAAAGTAACTC      |      |
| 7  | 7F-TYCGAGCATCHTAYCCHCGATT    | 55   |
|    | 7R-TGGTTTAGBCCBCCTCAKCCYCC   |      |
| 8  | 8F-CACTTYTGAGTNCCAGAAGT      | 56   |
|    | 8R-TAGGGTRTTTAGCTGTAAAC      |      |
| 9  | 9F-AGACCAAGAGCCTTCAAAGC      | 55   |
|    | 9R-GCTTCWACTATDGADGATGC      |      |
| 10 | 10F-GGNGGNTTYGGHAAAYTGACT    | 55   |
|    | 10R-GAARATRAAGCCTAGRGCTCA    |      |
| 11 | 11F-TTYACHGTHGGAATAGAYGT     | 46°C |
|    | 11R-GCRTCTTGRAANCCTARTTG     |      |
| 12 | 12F-CCCCCYAYWRYTGGTTTCAAGCCA | 55°C |
|    | 12R-GTKGAYGTRTCTAGTTGYGGCAT  |      |
| 13 | 13F-CAATGCTCHGARATYTYGG      | 56.5 |
|    | 13R-GANARDGCTCCYGTDAGNGGTCA  |      |
| 14 | 14F-GCCTAYGTNTTYACYCTNCTAGT  | 55   |
|    | 14R-TGATTGGAAGTCARYTGATC     |      |
| 15 | 15F-GTHTCYATCTATTGATGAGG     | 48   |
|    | 15R-CAGGTYAGRGGDATDAGTAT     |      |
| 16 | 16F-AGCYTYGYGAAGCAGCACTAGG   | 55   |
|    | 16R-GCKGTRGCTCCTATRTARCTTCA  |      |
| 17 | 17F-AGCTCHATYTYGYTHCGYCAAAC  | 55°C |
|    | 17R-CCAATTTTTTGGYTCCTAAGRCC  |      |
| 18 | 18F-CCGAAAAGYAYGCAAGAAGTGC   | 55°C |
|    | 18R-GCDGATTTTCCDGTKGCDGCTA   |      |
| 19 | 19F-GACGARCAAGYAGCHAAAYACAGC | 55   |
|    | 19R-GTDAKTADDAGGGCTCAGGCG    |      |
| 20 | 20F-GGMAGCCTNGCNYTAACAGG     | 46   |
|    | 20R-AGTTAATGGDHTDGGDGATTG    |      |
| 21 | 21F-CCATAACTRTAYAAAGCHGCAA   | 55°C |
|    | 21R-CCTCARAATGATATTTGKCCTCA  |      |
| 22 | 22F-CAGGMCTATTCCTRGCHATAACA  | 59   |
|    | 22R-CCCTTYTCTGGTTTACAAGACC   |      |
| 23 | 23F-CATCGGACAAGTACATCTAT     | 53   |
|    | 23R-CCTGAAGWAAGAACCAGATG     |      |

**Table S2.** The AT and GC content and skewness of Indian, Cambodian and Malayan gaur mitochondrial genome

**AT content**

| GenBank Accession No. | PCGs  | atp6  | atp8  | cox1  | cox2  | cox3  | cytb  | nad1  | nad2  | nad3  |
|-----------------------|-------|-------|-------|-------|-------|-------|-------|-------|-------|-------|
| MT345892              | 60.36 | 61.62 | 67.16 | 57.86 | 61.84 | 55.43 | 58.51 | 59.94 | 63.92 | 59.94 |
| MT345893              | 60.36 | 61.62 | 67.16 | 57.86 | 61.84 | 55.43 | 58.51 | 59.94 | 63.92 | 59.94 |
| MT360652              | 60.36 | 61.47 | 67.66 | 57.86 | 61.70 | 55.43 | 58.51 | 60.04 | 63.92 | 59.65 |
| MT360653              | 60.36 | 61.47 | 67.16 | 57.86 | 61.84 | 55.43 | 58.51 | 59.83 | 63.92 | 59.94 |
| JN632604              | 60.28 | 61.62 | 67.66 | 57.73 | 61.70 | 55.56 | 57.98 | 60.25 | 63.82 | 59.25 |
| MK770201              | 60.16 | 61.31 | 66.17 | 58.19 | 60.67 | 55.43 | 57.11 | 60.15 | 64.01 | 57.93 |

| GenBank Accession No. | nad4  | nad4L | nad5  | nad6  | rrnl  | rrns  | tRNAs | Control region | Mitogenome |
|-----------------------|-------|-------|-------|-------|-------|-------|-------|----------------|------------|
| MT345892              | 60.76 | 61.62 | 61.18 | 62.43 | 61.70 | 59.83 | 63.43 | 60.31          | 60.73      |
| MT345893              | 60.76 | 61.62 | 61.18 | 62.43 | 61.70 | 59.83 | 63.36 | 60.42          | 60.74      |
| MT360652              | 60.83 | 61.62 | 61.12 | 62.62 | 61.70 | 59.94 | 63.43 | 60.31          | 60.74      |
| MT360653              | 60.83 | 61.62 | 61.18 | 62.62 | 61.70 | 59.83 | 63.43 | 60.31          | 60.73      |
| JN632604              | 61.09 | 62.29 | 60.85 | 62.04 | 61.57 | 59.62 | 63.88 | 58.92          | 60.67      |
| MK770201              | 61.12 | 63.97 | 60.63 | 62.82 | 61.36 | 59.31 | 63.01 | 60.11          | 60.43      |

**GC- content**

| GenBank Accession No. | PCGs  | atp6  | atp8  | cox1  | cox2  | cox3  | cytb  | nad1  | nad2  | nad3  |
|-----------------------|-------|-------|-------|-------|-------|-------|-------|-------|-------|-------|
| MT345892              | 39.64 | 38.38 | 32.84 | 42.14 | 38.16 | 44.57 | 41.49 | 40.06 | 36.08 | 40.06 |
| MT345893              | 39.64 | 38.38 | 32.84 | 42.14 | 38.16 | 44.57 | 41.49 | 40.06 | 36.08 | 40.06 |
| MT360652              | 39.64 | 38.53 | 32.34 | 42.14 | 38.30 | 44.57 | 41.49 | 39.96 | 36.08 | 40.35 |
| MT360653              | 39.64 | 38.53 | 32.84 | 42.14 | 38.16 | 44.57 | 41.49 | 40.17 | 36.08 | 40.06 |
| JN632604              | 39.72 | 38.38 | 32.34 | 42.27 | 38.30 | 44.44 | 42.02 | 39.75 | 36.18 | 40.75 |
| MK770201              | 39.84 | 38.69 | 33.83 | 41.81 | 39.33 | 44.57 | 42.89 | 39.85 | 35.99 | 42.07 |

| GenBank Accession No. | nad4  | nad4L | nad5  | nad6  | rrnl  | rrns  | tRNAs | Control region | Mitogenome |
|-----------------------|-------|-------|-------|-------|-------|-------|-------|----------------|------------|
| MT345892              | 39.24 | 38.38 | 38.82 | 37.57 | 38.30 | 40.17 | 36.57 | 39.69          | 39.27      |
| MT345893              | 39.24 | 38.38 | 38.82 | 37.57 | 38.30 | 40.17 | 36.64 | 39.58          | 39.26      |
| MT360652              | 39.17 | 38.38 | 38.88 | 37.38 | 38.30 | 40.06 | 36.57 | 39.69          | 39.26      |
| MT360653              | 39.17 | 38.38 | 38.82 | 37.38 | 38.30 | 40.17 | 36.57 | 39.69          | 39.27      |
| JN632604              | 38.91 | 37.71 | 39.15 | 37.96 | 38.43 | 40.38 | 36.12 | 41.08          | 39.33      |
| MK770201              | 38.88 | 36.03 | 39.37 | 37.18 | 38.64 | 40.69 | 36.99 | 39.89          | 39.57      |

### AT -skewness

| GenBank Accession No. | PCGs    | atp6    | atp8    | cox1     | cox2    | cox3     | cytb    | nad1    | nad2    | nad3    |
|-----------------------|---------|---------|---------|----------|---------|----------|---------|---------|---------|---------|
| MT345892              | 0.04734 | 0.08861 | 0.18519 | -0.01119 | 0.11584 | -0.02765 | 0.08246 | 0.07504 | 0.14114 | 0.05769 |
| MT345893              | 0.04763 | 0.08861 | 0.18519 | -0.01119 | 0.11584 | -0.02765 | 0.08246 | 0.07504 | 0.14114 | 0.05769 |
| MT360652              | 0.04705 | 0.08629 | 0.19118 | -0.01119 | 0.11374 | -0.02765 | 0.08246 | 0.07317 | 0.14114 | 0.05314 |
| MT360653              | 0.04734 | 0.08629 | 0.18519 | -0.01119 | 0.11584 | -0.02765 | 0.08246 | 0.07692 | 0.14114 | 0.05769 |
| JN632604              | 0.05004 | 0.09367 | 0.17647 | -0.00673 | 0.11374 | -0.02529 | 0.08623 | 0.07639 | 0.14887 | 0.06341 |
| MK770201              | 0.05292 | 0.09415 | 0.18797 | -0.02336 | 0.12289 | -0.02765 | 0.10292 | 0.09217 | 0.14243 | 0.09453 |

| GenBank Accession No. | nad4    | nad4L   | nad5    | nad6     | rrnl    | rrns    | tRNAs   | Control region | Mitogenome |
|-----------------------|---------|---------|---------|----------|---------|---------|---------|----------------|------------|
| MT345892              | 0.06843 | 0.02732 | 0.07361 | -0.34796 | 0.22934 | 0.23077 | 0.02096 | 0.05147        | 0.10417    |
| MT345893              | 0.06843 | 0.02732 | 0.07361 | -0.34169 | 0.22934 | 0.23077 | 0.01994 | 0.05321        | 0.10415    |
| MT360652              | 0.06715 | 0.02732 | 0.07457 | -0.34375 | 0.22934 | 0.22862 | 0.02306 | 0.05147        | 0.10395    |
| MT360653              | 0.06715 | 0.02732 | 0.07361 | -0.34375 | 0.22934 | 0.23077 | 0.02096 | 0.05147        | 0.10406    |
| JN632604              | 0.05854 | 0.02703 | 0.08484 | -0.35016 | 0.22774 | 0.23158 | 0.02697 | 0.05164        | 0.10578    |
| MK770201              | 0.06683 | 0.01053 | 0.08696 | -0.33333 | 0.22407 | 0.22751 | 0.03062 | 0.06839        | 0.10747    |

### GC-skewness

| GenBank Accession No. | PCGs     | atp6     | atp8     | cox1     | cox2     | cox3     | cytb     | nad1     | nad2     | nad3     |
|-----------------------|----------|----------|----------|----------|----------|----------|----------|----------|----------|----------|
| MT345892              | -0.33660 | -0.39837 | -0.54545 | -0.21352 | -0.22605 | -0.35817 | -0.36998 | -0.38903 | -0.50000 | -0.39568 |
| MT345893              | -0.33660 | -0.39837 | -0.54545 | -0.21352 | -0.22605 | -0.35817 | -0.36998 | -0.38903 | -0.50000 | -0.39568 |
| MT360652              | -0.33615 | -0.39271 | -0.56923 | -0.21352 | -0.22137 | -0.35817 | -0.36998 | -0.38743 | -0.50000 | -0.38571 |
| MT360653              | -0.33660 | -0.39271 | -0.54545 | -0.21352 | -0.22605 | -0.35817 | -0.36998 | -0.39063 | -0.50000 | -0.39568 |
| JN632604              | -0.34088 | -0.40650 | -0.50769 | -0.22205 | -0.22901 | -0.36782 | -0.37370 | -0.39474 | -0.51724 | -0.40426 |
| MK770201              | -0.34351 | -0.41129 | -0.50000 | -0.19814 | -0.24164 | -0.35244 | -0.37832 | -0.41207 | -0.50933 | -0.43836 |

| GenBank Accession No. | nad4     | nad4L    | nad5     | nad6    | rrnl     | rrns     | tRNAs   | Control region | Mitogenome |
|-----------------------|----------|----------|----------|---------|----------|----------|---------|----------------|------------|
| MT345892              | -0.45353 | -0.33333 | -0.45403 | 0.59375 | -0.10150 | -0.10938 | 0.05455 | -0.29050       | -0.31983   |
| MT345893              | -0.45353 | -0.33333 | -0.45403 | 0.59375 | -0.10150 | -0.10938 | 0.04900 | -0.29412       | -0.31962   |
| MT360652              | -0.45251 | -0.33333 | -0.45480 | 0.59162 | -0.10150 | -0.10705 | 0.05455 | -0.29050       | -0.31868   |
| MT360653              | -0.45251 | -0.33333 | -0.45403 | 0.59162 | -0.10150 | -0.10938 | 0.05455 | -0.29050       | -0.31910   |
| JN632604              | -0.44090 | -0.33929 | -0.46143 | 0.58763 | -0.10448 | -0.10881 | 0.04954 | -0.21212       | -0.32203   |
| MK770201              | -0.45216 | -0.34579 | -0.46722 | 0.57895 | -0.10049 | -0.10026 | 0.04676 | -0.30362       | -0.32335   |

**Table S3.** Control region sequence of Indian gaur

> MT345892

AACACTATTAATATAGTTCCACAAACGCAAAGAGCTTTACCAGTATTAATTTAT  
CAAAAATTTCAACAACACTCAACACAGACTTTATACTCTAACCAAATATCACAAACA  
CCACTAGCTAATAACACACGCCCTCCCGCACACTACAAAATATACTCTTCACAGC  
AGGATACGTACATAATATTAATGTAATAAAGACATAATATGTATATAGTACATTA  
TATTATATGCCCCATGCATATAAGCAAGTACTTGAAC TTCATAGACAGTACATAG  
TACATGAACTCATTAAATCGTACATAGCACATTATGTCAAATTCATCCTTGACAGC  
ATGCGTATCCCTGCCATTAGATCACGAGCTTAATTACCATGCCGCGTGAAACCAG  
CAACCCGCTAGGCAGAGGATCCCTCTTCTCGCTCCGGGCCATAAACTGTGGGGG  
TCGCTATTTAATGAACTTTATCAGACATCTGGTTCTTTCTTCAGGGCCATCTC  
TAAAACCGTCCACTCTTTCTCTTAAATAAGACATCTCGATGGACTAATGACTAA  
TCAGCCCATGCTCACACATAACTGTGCTGTCATACATTTGGTATTTTTTTATTTG  
GGGGATGCTTGGACTCAGCTATGGCCGTCAGAGGCCCTGACCCGGAGCATTATT  
GTAGCTGGACTTAACTGCATCTTGAGCACCAGCATAATGATAGGCATGGACATTA  
CAGTCAATGGTCACAGGACATAAATTATATTATATATCCCCCTTCATAAACT  
TCCCCCTTAAATATTTACCACACTTTTAAACAGACTTTCCCCTAGTACTTGTTG  
AATTTCCACGATTTCAATACTCAAATTAGCACTCTAAATAAAGTCAATATATAA  
ACGCGGCCCCCCCCCCCCCC

> MT345893

AACACTATTAATATAGTTCCACAAACGCAAAGAGCTTTACCAGTATTAATTTAT  
CAAAAATTTCAACAACACTCAACACAGACTTTATACTCTAACCAAATATCACAAACA  
CCACTAGCTAATAACACACGCCCTCCCGCACACTACAAAATATACTCTTCACAGC  
AGGATACGTACATAATATTAATGTAATAAAGACATAATATGTATATAGTACATTA  
TATTATATGCCCCATGCATATAAGCAAGTACTTGAAC TTCATAGACAGTACATAG  
TACATGAACTCATTAAATCGTACATAGCACATTATGTCAAATTCATCCTTGACAGC  
ATGCGTATCCCTGCCATTAGATCACGAGCTTAATTACCATGCCGCGTGAAACCAG  
CAACCCGCTAGGCAGAGGATCCCTCTTCTCGCTCCGGGCCATAAACTGTGGGGG  
TCGCTATTTAATGAACTTTATCAGACATCTGGTTCTTTCTTCAGGGCCATCTC  
TAAAACCGTCCACTCTTTCTCTTAAATAAGACATCTCGATGGACTAATGACTAA  
TCAGCCCATGCTCACACATAACTGTGCTGTCATACATTTGGTATTTTTTTATTTG  
GGGGATGCTTGGACTCAGCTATGGCCGTCAGAGGCCCTGACCCGGAGCATTATT  
GTAGCTGGACTTAACTGCATCTTGAGCACCAGCATAATGATAGGCATGGACATTA

CAGTCAATGGTCACAGGACATAAATTATATTATATATATCCCCCCTTCCATAAAACT  
TCCCCCTTAAATATTTACCACCACTTTTAAACAGACTTTCCCCTAGTTACTTGTGTTG  
AATTTTCCACGATTTCAATACTCAAATTAGCACTCTAAATAAAGTCAATATATAA  
GCGCGGCCCCCCCCCCCCCC

> MT360652

AACACTATTAATATAGTTCCACAAACGCAAAGAGCTTTACCAGTATTAATTTAT  
CAAAAATTTCAACAACCTCAACACAGACTTTATACTCTAACCAAATATCACAAACA  
CCACTAGCTAATAACACACGCCCTCCCGCACACTACAAAATATACTCTTCACAGC  
AGGATATGTACATAATATTAATGTAATAAAGACATAATATGTATATAGTACATTA  
TATTATATGCCCCATGCGTATAAGCAAGTACTTGAAC TTCATAGACAGTACATAG  
TACATGAACTCATTAATCGTACATAGCACATTATGTCAAATTCATCCTTGACAGC  
ATGCGTATCCCTGCCATTAGATCACGAGCTTAACTACCATGCCGCGTGAAACCAG  
CAACCCGCTAGGCAGAGGATCCCTCTTCTCGCTCCGGGCCATAAACTGTGGGGG  
TCGCTATTTAATGAACTTTATCAGACATCTGGTTCTTTCTTCAGGGCCATCTCATC  
TAAAACCGTCCACTCTTTCCTCTTAAATAAGACATCTCGATGGACTAATGACTAA  
TCAGCCCATGCCACACATAACTGTGCTGTCATACATTTGGTATTTTTTTATTTTG  
GGGGATGCTTGGACTCAGCTATGGCCGTCAAAGGCCCTGACCCGGAGCATTATT  
GTAGCTGGACTTAACTGCATCTTGAGCACCAGCATAATGATAGGCATGGGCATTA  
CAGTCAATGGTTACAGGACATAAATTATATTATATATCCCCCCTTCCATAAAACT  
TCCCCCTTAAATATTTACCACCACTTTTAAACAGACTTTCCCCTAGTTACTTGTGTTA  
AATTTTCCACGATTTCAATACTCAAATTAGCACTCTAAATAAAGTCAATATATAA  
GCGCGGCCCCCCCCCCCCCC

> MT360653

AACACTATTAATATAGTTCCACAAACGCAAAGAGCTTTACCAGTATTAATTTAT  
CAAAAATTTCAACAACCTCAACACAGACTTTATACTCTAACCAAATATCACAAACA  
CCACTAGCTAATAACACACGCCCTCCCGCACACTACAAAATATACTCTTCACAGC  
AGGATACGTACATAATATTAATGTAATAAAGACATAATATGTATATAGTACATTA  
TATTATATGCCCCATGCATATAAGCAAGTACTTGAAC TTCATAGACAGTACATAG  
TACATGAACTCATTAATCGTACATAGCACATTATGTCAAATTCATCCTTGACAGC  
ATGCGTATCCCTGCCATTAGATCACGAGCTTAACTACCATGCCGCGTGAAACCAG  
CAACCCGCTAGGCAGAGGATCCCTCTTCTCGCTCCGGGCCATAAACTGTGGGGG  
TCGCTATTTAATGAACTTTATCAGACATCTGGTTCTTTCTTCAGGGCCATCTCATC  
TAAAACCGTCCACTCTTTCCTCTTAAATAAGACATCTCGATGGACTAATGACTAA  
TCAGCCCATGCTCACACATAACTGTGCTGTCATACATTTGGTATTTTTTTATTTTG  
GGGGATGCTTGGACTCAGCTATGGCCGTCAAAGGCCCTGACCCGGAGCATTATT  
GTAGCTGGACTTAACTGCATCTTGAGCACCAGCATAATGATAGGCATGGACATTA  
CAGTCAATGGTCACAGGACATAAATTATATTATATATCCCCCCTTCCATAAAACT  
TCCCCCTTAAATATTTACCACCACTTTTAAACAGACTTTCCCCTAGTTACTTGTGTTG  
AATTTTCCACGATTTCAATACTCAAATTAGCACTCTAAATAAAGTCAATATATAA  
GCGCGGCCCCCCCCCCCCCC
